# Supplementary material for: Anti-inflammatory actions of marine-derived omega-3 fatty acids
Source: MDPI journal article supplement (doi:10.3390/plants11101280), 2009-12-01
Supplement: s1 [file s1]

# Phytochemical Constituents and Antiproliferative Activities of Essential Oils from Four Varieties of Malaysian *Zingiber officinale* Roscoe against Human Cervical Cancer Cell Line

Atiqah Zaid <sup>1</sup>, Xue Rou Haw <sup>1</sup>, Huda Hisham Alkatib <sup>2</sup>, Sreenivasan Sasidharan <sup>2</sup>, Philip J. Marriott <sup>3</sup> and Yong Foo Wong <sup>1,\*</sup>

<sup>1</sup> Centre for Research on Multidimensional Separation Science, School of Chemical Sciences, Universiti Sains Malaysia, Penang 11800, Malaysia; atiqahzaid@student.usm.my (A.Z.); xuerouhaw306@gmail.com (X.R.H.)

<sup>2</sup> Institute for Research in Molecular Medicine (INFORMM), Universiti Sains Malaysia, Penang 11800, Malaysia; huda.alkatib22@gmail.com (H.H.A.); srisasidharan@usm.my (S.S.)

<sup>3</sup> Australian Centre for Research on Separation Science, School of Chemistry, Monash University, Wellington Road, Clayton, Melbourne, VIC 3800, Australia; philip.marriott@monash.edu

\* Correspondence: wongyongfoo@usm.my; Tel.: +604 653 4031

## Supplementary material

**Table S1** Secondary compounds tentatively identified in different ginger oils using GC-MS. Repeated entries for a given compound correspond to the different ginger varieties.

| No | Compound   | <sup>a</sup> T <sub>R</sub><br>(min) | CASRN     | Molecular<br>formula             | <sup>b</sup> Class | <sup>c</sup> Match Factor<br>(Reverse<br>Match Factor) | <sup>d</sup> m/z of significant ions (relative<br>ion abundance)                                                                                                    | RI <sub>ref</sub> | <sup>e</sup> RI <sub>cal</sub><br>(relative percentage abundance, %) |                         |                         |                          |
|----|------------|--------------------------------------|-----------|----------------------------------|--------------------|--------------------------------------------------------|---------------------------------------------------------------------------------------------------------------------------------------------------------------------|-------------------|----------------------------------------------------------------------|-------------------------|-------------------------|--------------------------|
|    |            |                                      |           |                                  |                    |                                                        |                                                                                                                                                                     |                   | BE                                                                   | CH                      | SA                      | BA                       |
| 1  | 2-Heptanol | 8.7                                  | 543-49-7  | C <sub>7</sub> H <sub>16</sub> O | OA                 | 922 (923);<br>920 (924);<br>911 (914)                  | 45.1(100), 55.1 (21.9), 83.1 (14.8);<br>45.1(100), 55.1 (25.8), 83.1 (16.4);<br>45.1(100), 55.1 (23.4), 83.1 (15.2)                                                 | 901               | 901<br>(0.4 ±<br>0.065)                                              | 8NA                     | 901<br>(0.1 ±<br>0.002) | 901<br>(0.1 ±<br>0.016)  |
| 2  | Tricyclene | 9.5                                  | 508-32-7  | C <sub>10</sub> H <sub>16</sub>  | MH                 | 913 (913);<br>912 (912);<br>909 (909);<br>917 (917)    | 93.1 (100), 91.1 (29.8), 121.1 (24.2);<br>93.1 (100), 91.1 (29.5), 121.1 (24.6);<br>93.1 (100), 91.1 (30.9), 121.1 (22.9);<br>93.1 (100), 91.1 (29.9), 121.1 (24.7) | 919               | 918<br>(0.3 ±<br>0.046)                                              | 919<br>(0.2 ±<br>0.046) | 918<br>(0.2 ±<br>0.001) | 918<br>(0.3 ±<br>0.036)  |
| 3  | Pinene, α- | 10.0                                 | 80-56-8   | C <sub>10</sub> H <sub>16</sub>  | MH                 | 931 (932);<br>934 (934);<br>930 (930);<br>933 (933)    | 93.1 (100), 91.1 (43.3), 92.1 (37.5);<br>93.1 (100), 91.1 (43.3), 92.1 (37.5);<br>93.1 (100), 91.1 (45.3), 92.1 (37.8);<br>93.1 (100), 91.1 (42.4), 92.1 (37.4)     | 931               | 931<br>(4.0 ±<br>0.714)                                              | 931<br>(3.3 ±<br>0.831) | 931<br>(3.0 ±<br>0.035) | 931<br>(2.8 ±<br>0.371)  |
| 4  | Camphene   | 10.7                                 | 79-92-5   | C <sub>10</sub> H <sub>16</sub>  | MH                 | 958 (967);<br>959 (966);<br>958 (965);<br>959 (967)    | 93.1 (100), 121.2 (74.9), 79.1 (36.2);<br>93.1 (100), 121.2 (76.7), 79.1 (35.9);<br>93.1 (100), 121.1 (72.6), 91.1 (36.2);<br>93.1 (100), 121.2 (76.8), 79.1 (36.2) | 946               | 946<br>(9.4 ±<br>1.708)                                              | 946<br>(7.2 ±<br>1.748) | 945<br>(7.2 ±<br>0.101) | 946<br>(10.5 ±<br>1.452) |
| 5  | Sabinene   | 11.8                                 | 3387-41-5 | C <sub>10</sub> H <sub>16</sub>  | MH                 | 914 (929);<br>922 (928);<br>907 (914);<br>901 (909)    | 93.1 (100), 91.1 (40.2), 77.1 (33.5);<br>93.1 (100), 91.1 (42.6), 77.1 (33.3);<br>93.1 (100), 91.1 (44.2), 77.1 (34.7);<br>93.1 (100), 91.1 (43.0), 77.1 (31.4)     | 971               | 970<br>(0.1 ±<br>0.022)                                              | 971<br>(0.1 ±<br>0.027) | 971<br>(0.1 ±<br>0.001) | 971<br>(0.1 ±<br>0.013)  |
| 6  | Pinene, β- | 11.9                                 | 127-91-3  | C <sub>10</sub> H <sub>16</sub>  | MH                 | 906 (906);<br>910 (910);<br>893 (893);<br>900 (900)    | 93.1 (100), 69.1 (28.2), 91.1 (27.9);<br>93.1 (100), 91.1 (27.4), 69.1 (27.2);<br>93.1 (100), 91.1 (29.6), 69.1 (26.0);<br>93.1 (100), 69.1 (27.4), 91.1 (27.3)     | 973               | 973<br>(0.8 ±<br>0.139)                                              | 973<br>(0.7 ±<br>0.180) | 973<br>(0.4 ±<br>0.004) | 973<br>(0.3 ±<br>0.035)  |
| 7  | Sulcatone  | 12.5                                 | 110-93-0  | C <sub>8</sub> H <sub>14</sub> O | AK                 | 906 (914);<br>892 (899);<br>863 (866);<br>912 (919)    | 108.1 (100), 69.1 (74.8), 55.1 (69.7);<br>108.1 (100), 69.1 (73.0), 55.1 (68.1);<br>108.1 (100), 69.1 (70.5), 55.1 (68.5);<br>108.1 (100), 69.1 (73.3), 55.1 (67.2) | 987               | 987<br>(0.3 ±<br>0.065)                                              | 987<br>(0.1 ±<br>0.027) | 987<br>(0.1 ±<br>0.002) | 987<br>(0.5 ±<br>0.062)  |

Table S1 (continued)

|    |                          |      |            |                                               |    |                                                     |                                                                                                                                                                         |      |                              |                              |                              |                               |
|----|--------------------------|------|------------|-----------------------------------------------|----|-----------------------------------------------------|-------------------------------------------------------------------------------------------------------------------------------------------------------------------------|------|------------------------------|------------------------------|------------------------------|-------------------------------|
| 8  | Myrcene, $\beta$ -       | 12.7 | 123-35-3   | C <sub>10</sub> H <sub>16</sub>               | MH | 941 (949);<br>930 (938);<br>925 (933);<br>935 (944) | 93.1 (100), 69.1 (65.1), 91.1 (23.0);<br>93.1 (100), 69.1 (64.0), 91.1 (23.0);<br>93.1 (100), 69.1 (62.9), 91.1 (24.4);<br>93.1 (100), 69.1 (64.5), 91.1 (22.8)         | 991  | 992<br>(2.2 $\pm$<br>0.394)  | 992<br>(1.8 $\pm$<br>0.483)  | 991<br>(1.5 $\pm$<br>0.022)  | 991<br>(1.5 $\pm$<br>0.182)   |
| 9  | Phellandrene, $\alpha$ - | 13.2 | 99-83-2    | C <sub>10</sub> H <sub>16</sub>               | MH | 845 (921);<br>856 (922);<br>876 (912);<br>888 (923) | 93.1 (100), 91.1 (55.7), 77.1 (33.4);<br>93.1 (100), 91.1 (55.1), 77.1 (32.6);<br>93.1 (100), 91.1 (57.7), 77.1 (34.2);<br>93.1 (100), 91.1 (55.4), 77.1 (33.1)         | 1002 | 1002<br>(0.6 $\pm$<br>0.102) | 1002<br>(0.5 $\pm$<br>0.118) | 1002<br>(0.6 $\pm$<br>0.009) | 1002<br>(0.6 $\pm$<br>0.073)  |
| 10 | 3-Carene                 | 13.5 | 13466-78-9 | C <sub>10</sub> H <sub>16</sub>               | MH | 921 (928);<br>920 (924);<br>919 (923);<br>937 (938) | 93.1 (100), 91.1 (46.1), 77.1 (30.6);<br>93.1 (100), 91.1 (48.1), 77.1 (30.7);<br>93.1 (100), 91.1 (49.7), 77.1 (35.3);<br>93.1 (100), 91.1 (49.3), 77.1 (31.9)         | 1008 | 1008<br>(0.1 $\pm$<br>0.021) | 1008<br>(0.1 $\pm$<br>0.023) | 1008<br>(0.1 $\pm$<br>0.032) | 1008<br>(0.06 $\pm$<br>0.009) |
| 11 | Cymene, p-               | 14.2 | 99-87-6    | C <sub>10</sub> H <sub>14</sub>               | MH | 884 (888);<br>940 (945);<br>874 (876);<br>890 (891) | 119.1 (100), 91.1 (22.3), 134.1 (20.9);<br>119.1 (100), 134.1 (27.4), 91.1 (18.8);<br>119.1 (100), 134.1 (28.0), 91.1 (17.7);<br>119.1 (100), 134.1 (28.0), 91.1 (19.7) | 1023 | 1023<br>(0.1 $\pm$<br>0.025) | 1023<br>(0.1 $\pm$<br>0.015) | 1023<br>(0.1 $\pm$<br>0.004) | 1023<br>(0.2 $\pm$<br>0.025)  |
| 12 | Phellandrene, $\beta$ -  | 14.4 | 555-10-2   | C <sub>10</sub> H <sub>16</sub>               | MH | 867 (904);<br>857 (884);<br>901 (904);<br>883 (895) | 93.1 (100), 91.1 (44.1), 77.1 (33.0);<br>93.1 (100), 91.1 (43.2), 77.1 (32.3);<br>93.1 (100), 91.1 (43.2), 77.1 (32.3);<br>93.1 (100), 91.1 (44.7), 77.1 (33.2)         | 1028 | 1028<br>(7.2 $\pm$<br>1.217) | 1028<br>(5.0 $\pm$<br>1.251) | 1028<br>(7.4 $\pm$<br>0.079) | 1028<br>(7.9 $\pm$<br>1.012)  |
| 13 | Eucalyptol               | 14.5 | 470-82-6   | C <sub>10</sub> H <sub>18</sub> O             | MO | 940 (940);<br>931 (931);<br>917 (917);<br>934 (934) | 81.1 (100), 108.1 (92.7), 111.1 (80.3);<br>81.1 (100), 108.1 (94.4), 154.2 (80.9);<br>81.1 (100), 108.1 (97.4), 111.1 (85.6);<br>81.1 (100), 108.1 (92.8), 154.2 (79.7) | 1029 | 1029<br>(4.1 $\pm$<br>0.675) | 1029<br>(2.4 $\pm$<br>0.642) | 1028<br>(2.3 $\pm$<br>0.038) | 1029<br>(2.3 $\pm$<br>0.314)  |
| 14 | 2-Heptanol, acetate      | 15.2 | 5921-82-4  | C <sub>9</sub> H <sub>18</sub> O <sub>2</sub> | AE | 926 (927);<br>887 (892);<br>932 (932)               | 87.1 (100), 56.1 (45.9), 98.1 (41.4);<br>87.1 (100), 56.1 (42.2), 98.1 (40.5);<br>87.1 (100), 56.1 (41.3), 98.2 (38.5)                                                  | 1054 | 1044<br>(0.1 $\pm$<br>0.010) | 1044<br>(0.1 $\pm$<br>0.040) | NA                           | 1044<br>(0.1 $\pm$<br>0.013)  |

Table S1 (continued)

|           |                                    |      |            |                                   |           |                                                     |                                                                                                                                                                         |             |                              |                              |                              |                              |
|-----------|------------------------------------|------|------------|-----------------------------------|-----------|-----------------------------------------------------|-------------------------------------------------------------------------------------------------------------------------------------------------------------------------|-------------|------------------------------|------------------------------|------------------------------|------------------------------|
| <b>15</b> | Terpinene, $\gamma$ -              | 15.8 | 99-85-4    | C <sub>10</sub> H <sub>16</sub>   | <i>MH</i> | 817 (912);<br>877 (899);<br>813 (870);<br>848 (889) | 93.1 (100), 91.1 (49.1), 136.2 (35.4);<br>93.1 (100), 91.1 (53.3), 136.2 (43.0);<br>93.1 (100), 91.1 (47.6), 136.2 (45.5);<br>93.1 (100), 91.1 (49.9), 136.2 (36.3)     | <b>1057</b> | 1057<br>(0.1 $\pm$<br>0.021) | 1057<br>(0.1 $\pm$<br>0.021) | 1057<br>(0.1 $\pm$<br>0.001) | 1057<br>(0.1 $\pm$<br>0.010) |
| <b>16</b> | Terpinolene                        | 17.2 | 586-62-9   | C <sub>10</sub> H <sub>16</sub>   | <i>MH</i> | 902 (910);<br>915 (923);<br>875 (876);<br>896 (907) | 121.1 (100), 93.1 (94.7), 136.2 (87.6);<br>121.1 (100), 93.1 (92.8), 136.2 (88.2);<br>121.1 (100), 93.1 (91.8), 136.2 (87.7);<br>121.1 (100), 93.1 (92.6), 136.2 (87.8) | <b>1085</b> | 1086<br>(0.6 $\pm$<br>0.092) | 1086<br>(0.7 $\pm$<br>0.331) | 1086<br>(0.4 $\pm$<br>0.005) | 1086<br>(0.4 $\pm$<br>0.065) |
| <b>17</b> | 2-Nonanone                         | 17.5 | 821-55-6   | C <sub>9</sub> H <sub>18</sub> O  | <i>AK</i> | 873 (887);<br>879 (910);<br>818 (853);<br>924 (928) | 58.1 (100), 71.1 (26.0), 59.1 (22.8);<br>58.1 (100), 71.1 (25.7), 57.1 (21.6);<br>58.1 (100), 71.1 (24.3), 57.1 (23.7);<br>58.1 (100), 71.1 (26.0), 57.1 (23.2)         | <b>1092</b> | 1092<br>(0.3 $\pm$<br>0.035) | 1092<br>(0.1 $\pm$<br>0.046) | 1092<br>(0.1 $\pm$<br>0.002) | 1092<br>(0.5 $\pm$<br>0.055) |
| <b>18</b> | Rosefuran                          | 17.7 | 15186-51-3 | C <sub>10</sub> H <sub>14</sub> O | <i>MO</i> | 904 (906);<br>920 (924);<br>873 (874);<br>914 (919) | 150.2 (100), 135.1 (89.6), 91.1 (39.7);<br>150.1 (100), 135.1 (80.9), 91.1 (41.7);<br>150.1 (100), 135.1 (92.1), 91.1 (41.1);<br>150.2 (100), 135.1 (93.2), 91.1 (42.5) | <b>1095</b> | 1097<br>(0.3 $\pm$<br>0.036) | 1097<br>(0.1 $\pm$<br>0.003) | 1097<br>(0.2 $\pm$<br>0.008) | 1097<br>(0.1 $\pm$<br>0.011) |
| <b>19</b> | Linalool                           | 17.8 | 78-70-6    | C <sub>10</sub> H <sub>18</sub> O | <i>OM</i> | 887 (902);<br>892 (900);<br>891 (901);<br>864 (880) | 71.1 (100), 93.1 (90.0), 69.1 (62.5);<br>71.1 (100), 93.1 (90.4), 69.1 (63.3);<br>71.1 (100), 93.1 (94.2), 69.1 (58.1);<br>71.1 (100), 93.1 (88.1), 69.1 (60.4)         | <b>1100</b> | 1100<br>(0.7 $\pm$<br>0.090) | 1100<br>(1.0 $\pm$<br>0.507) | 1100<br>(0.6 $\pm$<br>0.008) | 1100<br>(1.2 $\pm$<br>0.125) |
| <b>20</b> | 2-Nonanol                          | 17.9 | 628-99-9   | C <sub>9</sub> H <sub>20</sub> O  | <i>OA</i> | 866 (920)                                           | 45.1 (100), 69.1 (35.2), 55.1 (19.1)                                                                                                                                    | <b>1100</b> | 1101<br>(0.6 $\pm$<br>0.092) | NA                           | NA                           | NA                           |
| <b>21</b> | 1,3,7-Nonatriene,<br>4,8-dimethyl- | 18.7 | 19945-61-0 | C <sub>11</sub> H <sub>18</sub>   | <i>AH</i> | 893 (912);<br>895 (912);<br>892 (900)               | 69.1 (100), 81.1 (19.0), 79.1 (16.5);<br>69.1 (100), 81.1 (18.5), 79.1 (16.3);<br>69.1 (100), 81.1 (20.7), 79.0 (20.2)                                                  | <b>1118</b> | 1117<br>(0.1 $\pm$<br>0.013) | 1117<br>(0.1 $\pm$<br>0.058) | 1117<br>(0.1 $\pm$<br>0.005) | NA                           |
| <b>22</b> | Camphor                            | 19.8 | 76-22-2    | C <sub>10</sub> H <sub>16</sub> O | <i>MK</i> | 941 (941);<br>951 (958)                             | 95.1 (100), 81.1 (66.7), 108.1 (47.4);<br>95.1 (100), 81.1 (65.1), 108.1 (40.9)                                                                                         | <b>1142</b> | 1141<br>(0.1 $\pm$<br>0.008) | NA                           | NA                           | 1141<br>(0.1 $\pm$<br>0.012) |

Table S1 (continued)

|           |               |      |            |                                   |    |                                                     |                                                                                                                                                                     |             |                          |                          |                          |                          |
|-----------|---------------|------|------------|-----------------------------------|----|-----------------------------------------------------|---------------------------------------------------------------------------------------------------------------------------------------------------------------------|-------------|--------------------------|--------------------------|--------------------------|--------------------------|
| <b>23</b> | Citronellal   | 20.4 | 2385-77-5  | C <sub>10</sub> H <sub>18</sub> O | MA | 918 (918);<br>913 (913);<br>922 (923);<br>890 (890) | 69.1 (100), 95.1 (77.4), 55.1 (45.9);<br>69.1 (100), 95.1 (86.2), 55.1 (46.9);<br>69.1 (100), 95.1 (86.8), 55.1 (46.7);<br>95.1 (100), 69.1 (82.7), 55.1 (40.6)     | <b>1152</b> | 1154<br>(0.8 ±<br>0.081) | 1153<br>(0.3 ±<br>0.140) | 1153<br>(0.5 ±<br>0.003) | 1154<br>(0.3 ±<br>0.040) |
| <b>24</b> | Borneol       | 20.8 | 507-70-0   | C <sub>10</sub> H <sub>18</sub> O | OM | 923 (923);<br>917 (917);<br>910 (910);<br>940 (940) | 95.1 (100), 110.2 (20.6), 93.1 (9.1);<br>95.1 (100), 110.1 (20.7), 93.1 (9.0);<br>95.1 (100), 110.1 (20.2), 67.1 (9.8);<br>95.1 (100), 110.2 (21.1), 7.1 (9.6)      | <b>1163</b> | 1163<br>(0.8 ±<br>0.094) | 1163<br>(0.6 ±<br>0.282) | 1163<br>(0.7 ±<br>0.012) | 1163<br>(2.7 ±<br>0.302) |
| 25        | Iso-citral    | 20.9 | 72203-97-5 | C <sub>10</sub> H <sub>16</sub> O | MA | 986 (907);<br>925 (926);<br>875 (876);<br>889 (890) | 109.1 (100), 81.1 (96.6), 67.1 (94.3);<br>109.1 (100), 81.1 (93.2), 94.1 (90.6);<br>109.1 (100), 81.1 (96.6), 67.1 (93.3);<br>109.1 (100), 94.1 (93.6), 81.1 (92.6) | <b>1160</b> | 1165<br>(0.5 ±<br>0.054) | 1165<br>(0.4 ±<br>0.244) | 1165<br>(0.5 ±<br>0.009) | 1165<br>(0.5 ±<br>0.059) |
| <b>26</b> | 4-Terpineol   | 21.4 | 562-74-3   | C <sub>10</sub> H <sub>18</sub> O | OM | 803 (834);<br>852 (876);<br>800 (825);<br>801 (836) | 71.1 (100), 95.1 (70.1), 111.1 (65.6);<br>71.1 (100), 93.1 (70.7), 111.1 (69.9);<br>71.1 (100), 111.1 (69.3), 93.1 (65.6);<br>71.1 (100), 95.1 (92.1), 111.1 (66.0) | <b>1175</b> | 1175<br>(0.1 ±<br>0.015) | 1175<br>(0.1 ±<br>0.039) | 1175<br>(0.2 ±<br>0.09)  | 1175<br>(0.3 ±<br>0.031) |
| <b>27</b> | Terpineol, α- | 22.1 | 98-55-5    | C <sub>10</sub> H <sub>18</sub> O | OM | 907 (907);<br>900 (900);<br>882 (882);<br>899 (899) | 59.1 (100), 93.1 (82.2), 121.1 (75.7);<br>59.1 (100), 93.1 (83.8), 121.1 (78.0);<br>59.1 (100), 93.1 (88.3), 121.1 (85.2);<br>59.1 (100), 93.1 (81.7), 121.1 (76.1) | <b>1189</b> | 1189<br>(0.9 ±<br>0.114) | 1189<br>(0.8 ±<br>0.242) | 1189<br>(0.6 ±<br>0.006) | 1189<br>(0.6 ±<br>0.070) |
| <b>28</b> | Citral, β-    | 24.6 | 106-26-3   | C <sub>10</sub> H <sub>16</sub> O | MA | 929 (929);<br>936 (936);<br>926 (926);<br>936 (937) | 69.1 (100), 94.1 (37.0), 109.1 (36.2);<br>69.1 (100), 94.1 (36.6), 109.1 (35.4);<br>69.1 (100), 109.1 (40.0), 94.1 (37.8);<br>69.1 (100), 94.1 (36.9), 109.1 (35.9) | <b>1244</b> | 1245<br>(8.0 ±<br>0.981) | 1244<br>(5.6 ±<br>0.528) | 1244<br>(6.8 ±<br>0.030) | 1244<br>(8.1 ±<br>0.922) |
| <b>29</b> | Geraniol      | 25.3 | 106-24-1   | C <sub>10</sub> H <sub>18</sub> O | OM | 930 (930);<br>929 (929);<br>924 (924);<br>937 (937) | 69.1 (100), 68.1 (20.0), 93.1 (17.3);<br>69.1 (100), 68.1 (19.9), 93.1 (18.2);<br>69.1 (100), 68.1 (20.0), 93.1 (19.2);<br>69.1 (100), 68.1 (19.9), 93.1 (14.6)     | <b>1259</b> | 1259<br>(2.6 ±<br>0.319) | 1260<br>(5.0 ±<br>0.568) | 1258<br>(1.8 ±<br>0.008) | 1259<br>(4.2 ±<br>0.428) |

Table S1 (continued)

|           |                     |      |            |                                                |     |                                                     |                                                                                                                                                                             |             |                          |                          |                          |                          |
|-----------|---------------------|------|------------|------------------------------------------------|-----|-----------------------------------------------------|-----------------------------------------------------------------------------------------------------------------------------------------------------------------------------|-------------|--------------------------|--------------------------|--------------------------|--------------------------|
| <b>31</b> | Bornyl acetate      | 26.5 | 5655-61-8  | C <sub>12</sub> H <sub>20</sub> O <sub>2</sub> | MAc | 916 (917);<br>912 (912);<br>910 (910);<br>917 (917) | 95.1 (100), 93.1 (48.4), 121.1 (43.0);<br>95.1 (100), 93.1 (46.6), 121.1 (45.9);<br>95.1 (100), 93.1 (54.5), 136.2 (43.2);<br>95.1 (100), 93.1 (46.5), 121.1 (45.6)         | <b>1285</b> | 1286<br>(0.1 ±<br>0.016) | 1286<br>(0.3 ±<br>0.033) | 1286<br>(0.1 ±<br>0.001) | 1286<br>(0.6 ±<br>0.150) |
| <b>32</b> | 2-Undecanone        | 26.9 | 112-12-9   | C <sub>11</sub> H <sub>22</sub> O              | AK  | 938 (949);<br>910 (922);<br>913 (923);<br>933 (941) | 58.1 (100), 71.1 (37.9), 59.1 (30.0);<br>58.1 (100), 71.1 (38.2), 59.1 (29.8);<br>58.1 (100), 71.1 (39.3), 59.1 (30.0);<br>58.1 (100), 71.1 (37.8), 59.1 (29.8)             | <b>1295</b> | 1295<br>(0.7 ±<br>0.117) | 1295<br>(0.2 ±<br>0.029) | 1295<br>(0.5 ±<br>0.002) | 1295<br>(0.6 ±<br>0.178) |
| <b>33</b> | 2-Undecanol         | 27.2 | 1653-30-1  | C <sub>11</sub> H <sub>24</sub> O              | OA  | 922 (947);<br>892 (930);<br>902 (918);<br>874 (913) | 45.1 (100), 55.1 (23.6), 83.1 (22.5);<br>45.1 (100), 55.1 (27.0), 83.1 (23.5);<br>45.1 (100), 83.1 (26.2), 83.1 (21.9);<br>45.1 (100), 55.1 (27.3), 83.1 (26.1)             | <b>1301</b> | 1302<br>(0.2 ±<br>0.032) | 1302<br>(0.1 ±<br>0.011) | 1302<br>(0.1 ±<br>0.001) | 1302<br>(0.1 ±<br>0.020) |
| <b>34</b> | Elemene, δ-         | 28.7 | 20307-84-0 | C <sub>15</sub> H <sub>24</sub>                | SH  | 897 (900);<br>915 (915)                             | 121.1 (100), 93.1 (65.9), 136.2 (61.5);<br>121.1 (100), 93.1 (64.7), 136.1 (53.7)                                                                                           | <b>1337</b> | NA                       | 1337<br>(0.3 ±<br>0.248) | 1337<br>(0.1 ±<br>0.001) | NA                       |
| <b>35</b> | Citronellyl acetate | 29.5 | 150-84-5   | C <sub>12</sub> H <sub>22</sub> O <sub>2</sub> | MAc | 806 (819);<br>903 (904);<br>905 (905);<br>901 (902) | 95.1 (100), 81.1 (97.5), 69.1 (97.0);<br>81.1 (100), 95.1 (99.7), 69.1 (94.2);<br>95.1 (100), 81.1 (93.2), 69.1 (86.8);<br>81.1 (100), 95.1 (98.9), 69.1 (94.0)             | <b>1355</b> | 1355<br>(0.1 ±<br>0.038) | 1355<br>(0.7 ±<br>0.217) | 1355<br>(0.1 ±<br>0.001) | 1355<br>(0.4 ±<br>0.090) |
| <b>36</b> | Cyclosativene       | 29.9 | 22469-52-9 | C <sub>15</sub> H <sub>24</sub>                | SH  | 897 (898);<br>884 (885);<br>851 (851);<br>918 (920) | 105.1 (100), 161.2 (97.1), 204.3 (79.8);<br>105.1 (100), 161.2 (83.9), 119.1 (76.5);<br>161.2 (100), 105.1 (83.5), 119.1 (68.8);<br>105.1 (100), 161.2 (95.6), 119.1 (82.0) | <b>1362</b> | 1363<br>(0.1 ±<br>0.024) | 1363<br>(0.1 ±<br>0.038) | 1363<br>(0.1 ±<br>0.009) | 1363<br>(0.1 ±<br>0.023) |
| <b>37</b> | Copaene             | 30.4 | 3856-25-5  | C <sub>15</sub> H <sub>24</sub>                | SH  | 896 (896);<br>891 (891);<br>874 (874);<br>866 (866) | 161.2 (100), 119.1 (95.3), 105.1 (86.3);<br>161.2 (100), 119.1 (95.7), 105.1 (85.6);<br>161.2 (100), 119.1 (95.3), 105.1 (86.3);<br>161.2 (100), 119.1 (93.4), 105.1 (83.2) | <b>1374</b> | 1374<br>(0.2 ±<br>0.060) | 1374<br>(0.3 ±<br>0.027) | 1374<br>(0.3 ±<br>0.001) | 1374<br>(0.2 ±<br>0.038) |
| <b>38</b> | Geranyl acetate     | 30.8 | 105-87-3   | C <sub>12</sub> H <sub>20</sub> O <sub>2</sub> | MAc | 893 (905);<br>934 (937);<br>881 (899);<br>941 (942) | 69.1 (100), 93.1 (46.9), 68.1 (41.6);<br>69.1 (100), 68.1 (38.8), 93.1 (34.3);<br>69.1 (100), 93.1 (52.4), 68.1 (37.7);<br>69.1 (100), 68.1 (38.6), 93.1 (34.4)             | <b>1385</b> | 1385<br>(0.2 ±<br>0.053) | 1388<br>(6.4 ±<br>0.533) | 1385<br>(0.2 ±<br>0.001) | 1386<br>(2.3 ±<br>0.582) |

Table S1 (continued)

|           |                       |      |            |                                 |    |                                                     |                                                                                                                                                                             |             |                              |                               |                               |                               |
|-----------|-----------------------|------|------------|---------------------------------|----|-----------------------------------------------------|-----------------------------------------------------------------------------------------------------------------------------------------------------------------------------|-------------|------------------------------|-------------------------------|-------------------------------|-------------------------------|
| <b>39</b> | Elemene, $\beta$ -    | 31.1 | 515-13-9   | C <sub>15</sub> H <sub>24</sub> | SH | 883 (900);<br>877 (877);<br>877 (892);<br>885 (899) | 93.1 (100), 81.1 (87.6), 67.1 (64.6);<br>93.1 (100), 81.1 (87.6), 67.1 (64.6);<br>93.1 (100), 81.1 (86.4), 107.1 (68.4);<br>93.1 (100), 81.1 (83.4), 107.1 (62.6)           | <b>1391</b> | 1391<br>(0.5 $\pm$<br>0.152) | 1391<br>(0.7 $\pm$<br>0.053)  | 1391<br>(0.7 $\pm$<br>0.018)  | 1391<br>(0.3 $\pm$<br>0.079)  |
| <b>40</b> | Sesquithujene         | 31.7 | 58319-06-5 | C <sub>15</sub> H <sub>24</sub> | SH | 897 (905);<br>905 (957);<br>899 (953);<br>911 (968) | 93.1 (100), 119.1 (91.5), 91.1 (46.6);<br>119.1 (100), 93.1 (86.0), 91.1 (40.4);<br>119.1 (100), 93.1 (95.5), 91.1 (46.1);<br>119.1 (100), 93.1 (90.6), 91.1 (39.9)         | <b>1405</b> | 1406<br>(0.1 $\pm$<br>0.014) | 1406<br>(0.1 $\pm$<br>0.009)  | 1406<br>(0.1 $\pm$<br>0.001)  | 1406<br>(0.1 $\pm$<br>0.027)  |
| <b>41</b> | Caryophyllene         | 32.2 | 87-44-5    | C <sub>15</sub> H <sub>24</sub> | SH | 846 (846);<br>844 (844);<br>863 (863);<br>822 (824) | 91.1 (100), 161.1 (94.4), 120.1 (76.6);<br>161.1 (100), 91.1 (90.0), 120.1 (78.4);<br>161.2 (100), 91.1 (76.4), 120.1 (76.0);<br>91.1 (100), 107.1 (72.9), 79.0 (61.3)      | <b>1417</b> | 1417<br>(0.1 $\pm$<br>0.039) | 1417<br>(0.1 $\pm$<br>0.015)  | 1417<br>(0.1 $\pm$<br>0.001)  | 1417<br>(0.1 $\pm$<br>0.035)  |
| <b>42</b> | Elemene, $\gamma$ -   | 32.8 | 29873-99-2 | C <sub>15</sub> H <sub>24</sub> | SH | 919 (940);<br>923 (945);<br>917 (917);<br>846 (882) | 121.1 (100), 93.1 (62.1), 107.1 (37.8);<br>121.1 (100), 93.1 (61.9), 107.1 (44.2);<br>121.1 (100), 93.1 (62.6), 107.1 (42.7);<br>121.1 (100), 93.1 (69.5), 107.1 (55.6)     | <b>1433</b> | 1433<br>(0.4 $\pm$<br>0.090) | 1433<br>(0.4 $\pm$<br>0.041)  | 1433<br>(0.5 $\pm$<br>0.009)  | 1433<br>(0.1 $\pm$<br>0.011)  |
| <b>43</b> | Germacrene D          | 34.7 | 23986-74-5 | C <sub>15</sub> H <sub>24</sub> | SH | 912 (933);<br>919 (936);<br>916 (934);<br>863 (891) | 161.2 (100), 105.1 (54.1), 91.1 (47.0);<br>161.2 (100), 105.1 (54.5), 91.1 (46.5);<br>161.2 (100), 105.1 (54.9), 91.1 (48.1);<br>161.2 (100), 119.1 (86.4), 105.1 (72.7)    | <b>1480</b> | 1480<br>(0.9 $\pm$<br>0.153) | 1480<br>(1.2 $\pm$<br>0.496)  | 1480<br>(1.5 $\pm$<br>0.023)  | 1480<br>(0.3 $\pm$<br>0.043)  |
| <b>44</b> | Curcumene, $\alpha$ - | 34.9 | 644-30-4   | C <sub>15</sub> H <sub>22</sub> | SH | 917 (936);<br>909 (937);<br>908 (932);<br>932 (940) | 119.1 (100), 132.1 (87.6), 105.1 (52.5);<br>119.1 (100), 132.1 (86.7), 105.1 (53.1);<br>119.1 (100), 132.1 (87.5), 105.1 (53.9);<br>119.1 (100), 132.1 (88.8), 105.1 (50.3) | <b>1484</b> | 1484<br>(2.6 $\pm$<br>0.395) | 1483<br>(2.2 $\pm$<br>0.222)  | 1484<br>(3.6 $\pm$<br>0.045)  | 1484<br>(4.5 $\pm$<br>0.850)  |
| <b>45</b> | Eudesmene, $\beta$ -  | 35.2 | 17066-67-0 | C <sub>15</sub> H <sub>24</sub> | SH | 926 (950);<br>926 (950);<br>931 (931)               | 161.2 (100), 189.2 (68.8), 105.1 (67.4);<br>161.2 (100), 189.2 (68.6), 105.1 (67.6);<br>161.2 (100), 189.2 (72.2), 133.1 (68.8)                                             | <b>1492</b> | 1492<br>(0.6 $\pm$<br>0.091) | 1492<br>(0.7 $\pm$<br>0.065)  | 1492<br>(0.9 $\pm$<br>0.131)  | NA                            |
| <b>46</b> | Zingiberene           | 35.5 | 495-60-3   | C <sub>15</sub> H <sub>24</sub> | SH | 861 (886);<br>902 (955);<br>896 (951);<br>898 (950) | 119.1 (100), 93.1 (82.9), 91.1 (46.8);<br>119.1 (100), 93.1 (84.4), 91.1 (42.8);<br>119.1 (100), 93.1 (82.9), 91.1 (46.7);<br>119.1 (100), 93.1 (84.3), 91.1 (43.7)         | <b>1499</b> | 1499<br>(7.9 $\pm$<br>1.132) | 1498<br>(12.1 $\pm$<br>1.003) | 1497<br>(14.0 $\pm$<br>1.288) | 1499<br>(10.8 $\pm$<br>1.863) |

Table S1 (continued)

|    |                                   |      |            |                                   |    |                                                     |                                                                                                                                                                          |             |                              |                              |                              |                              |
|----|-----------------------------------|------|------------|-----------------------------------|----|-----------------------------------------------------|--------------------------------------------------------------------------------------------------------------------------------------------------------------------------|-------------|------------------------------|------------------------------|------------------------------|------------------------------|
| 47 | Bisabolene, $\beta$ -             | 36.0 | 495-61-4   | C <sub>15</sub> H <sub>24</sub>   | SH | 890 (899);<br>942 (948);<br>936 (942);<br>886 (886) | 93.1 (100), 69.1 (56.3), 107.1 (48.1);<br>93.1 (100), 107.1 (52.6), 119.1 (47.2);<br>93.1 (100), 107.1 (54.9), 91.1 (46.5);<br>93.1 (100), 69.1 (66.1), 107.1 (44.0)     | <b>1510</b> | 1510<br>(4.6 $\pm$<br>0.696) | 1510<br>(7.4 $\pm$<br>0.598) | 1510<br>(8.4 $\pm$<br>0.145) | 1510<br>(4.6 $\pm$<br>0.909) |
| 48 | Sesquiphellandrene<br>, $\beta$ - | 36.6 | 20307-83-9 | C <sub>15</sub> H <sub>24</sub>   | SH | 906 (917);<br>936 (925);<br>899 (910);<br>912 (936) | 69.1 (100), 93.1 (68.4), 91.1 (64.8);<br>69.1 (100), 93.1 (68.0), 91.1 (61.1);<br>69.1 (100), 93.1 (68.0), 91.1 (61.1);<br>69.1 (100), 93.1 (67.6), 91.1 (60.9)          | <b>1525</b> | 1525<br>(3.2 $\pm$<br>0.511) | 1526<br>(4.6 $\pm$<br>0.468) | 1526<br>(5.2 $\pm$<br>0.065) | 1526<br>(4.5 $\pm$<br>0.967) |
| 49 | Bisabolene, $\gamma$ -            | 36.8 | 53585-13-0 | C <sub>15</sub> H <sub>24</sub>   | SH | 879 (930);<br>876 (912);<br>867 (900);<br>874 (907) | 93.1 (100), 107.1 (99.5), 119.1 (48.2);<br>93.1 (100), 107.1 (94.6), 119.1 (49.4);<br>93.1 (100), 107.1 (90.6), 119.1 (52.0);<br>93.1 (100), 107.1 (94.6), 119.1 (44.8)  | <b>1533</b> | 1532<br>(0.1 $\pm$<br>0.022) | 1532<br>(0.2 $\pm$<br>0.027) | 1533<br>(0.2 $\pm$<br>0.008) | 1533<br>(0.1 $\pm$<br>0.023) |
| 50 | Elemol                            | 37.5 | 21657-90-9 | C <sub>15</sub> H <sub>26</sub> O | OS | 926 (929);<br>926 (929);<br>941 (946);<br>918 (921) | 93.1 (100), 59.1 (98.7), 161.2 (80.1);<br>93.1 (100), 59.1 (96.9), 161.2 (81.9);<br>93.1 (100), 59.1 (91.3), 161.2 (85.4);<br>93.1 (100), 59.1 (97.7), 161.2 (80.8)      | <b>1549</b> | 1549<br>(0.9 $\pm$<br>0.105) | 1549<br>(1.2 $\pm$<br>0.122) | 1549<br>(0.7 $\pm$<br>0.007) | 1549<br>(0.3 $\pm$<br>0.077) |
| 51 | Nerolidol                         | 38.1 | 40716-66-3 | C <sub>15</sub> H <sub>26</sub> O | OS | 928 (932);<br>928 (932);<br>922 (925);<br>902 (909) | 69.1 (100), 93.1 (80.7), 107.1 (47.3);<br>69.1 (100), 93.1 (81.5), 107.1 (47.7);<br>69.1 (100), 93.1 (86.3), 107.1 (49.4);<br>69.1 (100), 93.1 (81.9), 107.1 (47.2)      | <b>1564</b> | 1565<br>(0.8 $\pm$<br>0.251) | 1565<br>(0.8 $\pm$<br>0.062) | 1564<br>(0.7 $\pm$<br>0.033) | 1564<br>(0.2 $\pm$<br>0.023) |
| 52 | Sesquisabinene<br>hydrate         | 39.0 | 58319-05-4 | C <sub>15</sub> H <sub>26</sub> O | OS | 891 (897);<br>890 (896);<br>879 (885);<br>886 (889) | 69.1 (100), 93.1 (92.8), 119.1 (89.8);<br>69.1 (100), 93.1 (91.9), 119.1 (89.6);<br>93.1 (100), 69.1 (99.4), 119.1 (93.8);<br>69.1 (100), 93.1 (89.8), 119.1 (89.8)      | <b>1590</b> | 1589<br>(0.4 $\pm$<br>0.061) | 1589<br>(0.3 $\pm$<br>0.048) | 1589<br>(0.3 $\pm$<br>0.022) | 1590<br>(0.4 $\pm$<br>0.092) |
| 53 | Eudesmol, $\gamma$ -              | 40.1 | 1209-71-8  | C <sub>15</sub> H <sub>26</sub> O | OS | 880 (894);<br>881 (893);<br>858 (866);<br>899 (907) | 161.2 (100), 189.2 (81.2), 81.1 (65.7);<br>161.2 (100), 189.2 (80.8), 81.1 (65.1);<br>161.2 (100), 189.2 (80.8), 81.1 (65.1);<br>189.2 (100), 161.2 (83.0), 133.1 (55.5) | <b>1620</b> | 1618<br>(0.4 $\pm$<br>0.074) | 1618<br>(0.3 $\pm$<br>0.008) | 1618<br>(0.3 $\pm$<br>0.035) | 1618<br>(0.1 $\pm$<br>0.032) |



Table S1 (continued)

|                         |              |      |            |                                   |    |                                                     |                                                                                                                                                                         |             |                          |                          |                          |                          |
|-------------------------|--------------|------|------------|-----------------------------------|----|-----------------------------------------------------|-------------------------------------------------------------------------------------------------------------------------------------------------------------------------|-------------|--------------------------|--------------------------|--------------------------|--------------------------|
| <b>54</b>               | Muurolol, T- | 41.0 | 19912-62-0 | C <sub>15</sub> H <sub>26</sub> O | OS | 820 (877);<br>822 (884);<br>803 (859)               | 161.2 (100), 95.1 (61.0), 105.1 (47.5);<br>161.2 (100), 95.1 (58.6), 105.1 (46.1);<br>161.2 (100), 95.1 (53.8), 204.2 (50.7)                                            | <b>1641</b> | 1641<br>(0.3 ±<br>0.040) | 1641<br>(0.2 ±<br>0.034) | 1641<br>(0.2 ±<br>0.029) | NA                       |
| <b>55</b>               | Cubenol      | 41.1 | 21284-22-0 | C <sub>15</sub> H <sub>26</sub> O | OS | 810 (868);<br>834 (890);<br>813 (866)               | 161.2 (100), 119.1 (96.4), 95.1 (75.2);<br>161.2 (100), 119.1 (98.1), 95.1 (70.6);<br>161.1 (100), 119.1 (94.0), 105.0 (66.1)                                           | <b>1646</b> | 1646<br>(0.1 ±<br>0.040) | 1646<br>(0.1 ±<br>0.019) | 1646<br>(0.1 ±<br>0.006) | NA                       |
| <b>56</b>               | Eudesmol, β- | 41.2 | 473-15-4   | C <sub>15</sub> H <sub>26</sub> O | OS | 907 (918);<br>905 (914);<br>887 (895);<br>846 (869) | 59.1 (100), 149.2 (85.2), 164.2 (43.1);<br>59.1 (100), 149.2 (86.6), 164.2 (44.8);<br>59.1 (100), 149.2 (99.1), 164.2 (50.4);<br>59.1 (100), 149.2 (86.1), 119.1 (54.0) | <b>1649</b> | 1649<br>(0.8 ±<br>0.128) | 1649<br>(0.6 ±<br>0.017) | 1649<br>(0.6 ±<br>0.005) | 1649<br>(0.4 ±<br>0.085) |
| <b>57</b>               | Farnesol     | 43.9 | 106-28-5   | C <sub>15</sub> H <sub>26</sub> O | OS | 855 (889)                                           | 69.1 (100), 81.1 (33.2), 93.1 (29.8)                                                                                                                                    | <b>1722</b> | NA                       | 1722<br>(0.1 ±<br>0.023) | NA                       | NA                       |
| <b>58</b>               | Farnesal     | 44.6 | 502-67-0   | C <sub>15</sub> H <sub>24</sub> O | SA | 905 (912);<br>903 (909);<br>892 (894);<br>890 (929) | 69.1 (100), 84.1 (55.8), 81.1 (24.7);<br>69.1 (100), 84.1 (54.6), 81.1 (24.3);<br>69.1 (100), 84.1 (54.9), 81.1 (22.8);<br>69.1 (100), 84.1 (56.4), 81.1 (24.1)         | <b>1740</b> | 1742<br>(0.2 ±<br>0.049) | 1742<br>(0.1 ±<br>0.031) | 1742<br>(0.1 ±<br>0.007) | 1742<br>(0.1 ±<br>0.027) |
| <b>Total identified</b> |              |      |            |                                   |    |                                                     |                                                                                                                                                                         |             | <b>82.6</b>              | <b>83.8</b>              | <b>84.6</b>              | <b>87.4</b>              |

<sup>a</sup>Retention time of eluted compounds.

<sup>b</sup>Class of chemical compounds: *MH* monoterpenic hydrocarbon, *MO* monoterpenic oxide, *MA* monoterpenic aldehyde, *OM* monoterpenic alcohol, *MK* monoterpenic ketone, *MAc* monoterpenic acetate, *SH* sesquiterpenic hydrocarbon, *SA* sesquiterpenic aldehyde, *OS* sesquiterpenic alcohol, *AH* acyclic hydrocarbon, *AK* acyclic ketone, *AE* acyclic ester, *OA* acyclic alcohol.

<sup>c</sup>Matching scores of compounds reported ≥80% based on mass spectra in NIST library database and in the order of Bentong (BE), Cameron Highlands (CH), Sabah (SA) and Bara (BA) gingers.

<sup>d</sup>Fragmentation patterns reported in order of BE, CH, SA and BA.

<sup>e</sup>Retention index (RI) values calculated using Van Den Dool and Kratz equation with the reference to RI values from NIST WebBook and Adams (2007) within the range of ±10.

<sup>f</sup>Relative percentage abundance calculated on the basis of TIC (Total Ion Chromatogram) area as the percentage of total TIC area.

<sup>g</sup>NA: compound not available.

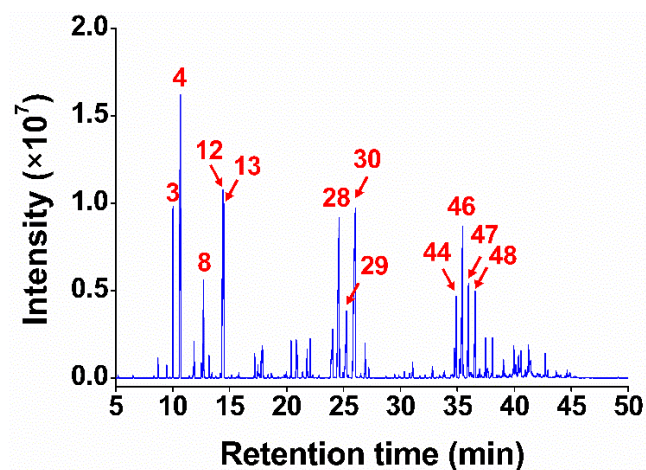

(a)

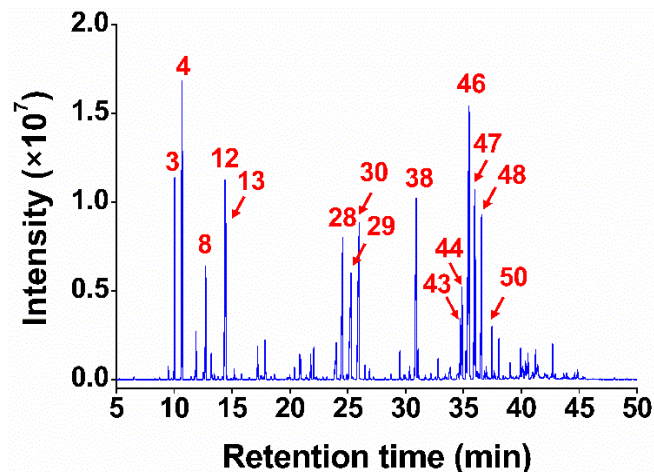

(b)

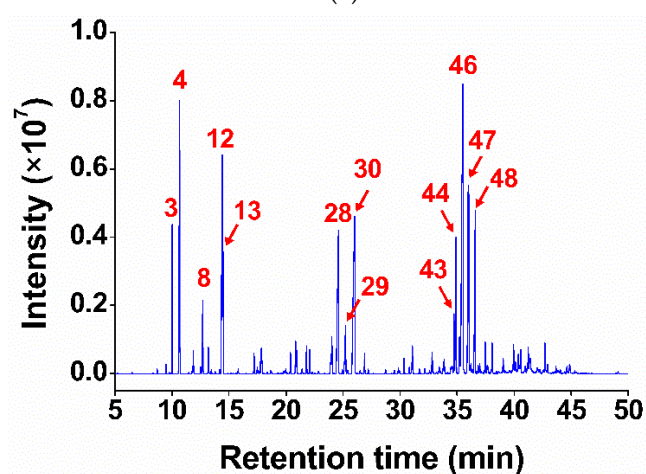

(c)

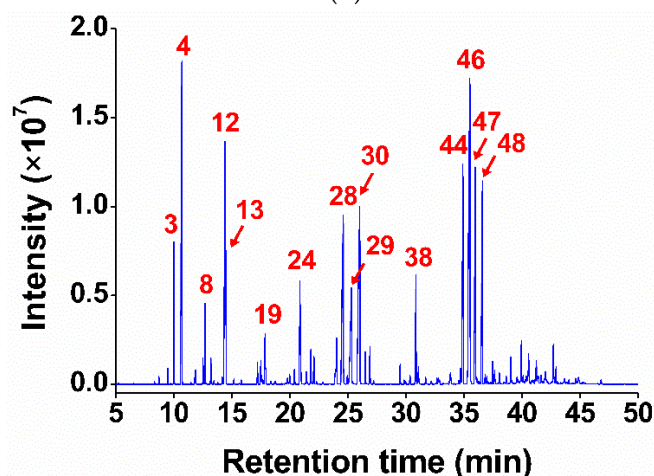

(d)

**Figure S1.** Total ion chromatograms (TICs) of the volatile profile of *Z. officinale* essential oil varieties. (a) Bentong, BE; (b) Cameron Highlands, CH; (c) Sabah, SA; and (d) Bara, BA. The peak numbering refers to Table S1.
